# Supplementary material
Source: PubMed Central journal article supplement (PMC5763082)
Supplement: mmc1.pdf [file mmc1.pdf]

YMTHE, Volume 26

## **Supplemental Information**

### **TGF- $\beta$ Mediates Renal Fibrosis via the Smad3-ErbB4-IR Long Noncoding RNA Axis**

**Min Feng, Patrick Ming-Kuen Tang, Xiao-Ru Huang, Si-Fan Sun, Yong-Ke You, Jun Xiao, Lin-Li Lv, An-Ping Xu, and Hui-Yao Lan**

5'-

ATGACAAAATGGAAAATTTACTCTCTGCTGCTTTGTAATTTTGCTTTCAGAAAATTGCTACATTACTTGCCTAC  
ATTTGAGCTGAAAAATAAAAAACATAAGTTGACGTTCTATCTAAGGTATAACATTTTCTTTCTCTGCTATGGT  
ATAATCTTTTTTTCGTGGTTTGTCTTTCTCTCATTCCCTCTTTGTTAGTGATATTACTAGTTAATTAGAAGATAGC  
ATTTTTATTTTTGGTGAATGAAAATCAACGTTTTGTGGTCTTGTTGAGCTTTTCACCTGGCTGCAGTTTACACA  
TATTTAGCTATTATGTACTGGTGATAACACAGTGAACAGTGGTGTACAGAATGGTTTCATCATTGCCCCAA  
GTTCCCCTGGTGGCTCAGGCTTAGAGACTTTTACCTTCTATGGAACTGAGAAAATGAGAGTATAGGTAAT  
ATTATAAAAAGAACAATAACGATTTCTCATTCAAATTTTGCCGTGCTTAACAATATCCATGCAAATACATCGG  
CTAAGGATGTAAGAGTGATTAGAGACAAGGCTGGAGCTTGGGAGGCTTTGAAAATTTCTGGCCATGGGTT  
TGGGAATGATCAGAACATGAGTGGTTGCACAAATACAAAGGATGCATAGAATAACCTAATAAGAACTGGAT  
GATTAGAACAGCACATCCTTGAAGCAGTGTGTTGCTGGAGATAAACCCACTGAAGACGACTGAACTTCTGA  
AGAGGTTAAATAGGAATGAGAGTGTATTCTCATTACATAAAGATAACAGGGTCACCATGGCAGACATGGC  
AGCATCTTCCATTAAGTTGTGATTTAGCCTCAAATGATGAGTGCATCGAGAATTGCCCTAGTGATTTTACTT  
GGATCAGATTCATCTATGTGAAAGGCATTATACTTTATTGACATAATTTTACATGTTTCATCTTTTTTCAATGT  
GCGTTACATGTTTCCTTTTCTTTCTACAATGAATGCTGAGAAAAGTTATCCTGCTCCTGGAGATTCATAACATA  
AAAACAGAGTAAGTCAGATAGCTGCGATTCAAAGCAAATCTAAAGAATTGAGCTTGACCGCTTTATTTGTTG  
ACATGGAAATAGACCTGCAGAGTGGAGTGACTTGCTAAGGACAGACAGTTAGTATGCTTTTCACAGTAGCT  
GATTATGTTGCTGCCCCACTCTCCTCTATGACTAATGCTGGAGACACGGATCTTAACACATTGTCGTTAT  
ATCTATTAGAAGTGGGCATTATGTTAATGAAGATTTCTCATGAAAGGCTCATGAGATCATTAAAGCTGTTTTAA  
TAAGAGATAAAATATTATTTACTGTTGACAATTTTCAACTCGCCACAGAAATCCACAAATCAAAAAGTTTTTTT  
CTTTTATATTTGTACAGATTCTAACAGTGCCTACAGTTTATCCACAAATTCTTTAAAATCTATTAGTGCAGAG  
GGGAAAATCCACAGATAATAAGTGGCTATTACATCGACACCTTCTACTAAGTATTCATGGGATCACTCTG  
TCCGACAGCTTGTTGGGGTGTGTGAAAGACAATCTGTCTTAAATTTATCTGTCTCCTAGTACAAAAGAAG  
AAAAATTCTCCCTCCTGATTCTCACCATAGTAAAATCATAGACATTAAGGAATATAGTATTGAATCCAAGGA  
CAGACAGAAGGTTTACTTCATTTATTTGTCTTTGGAAAAGAAGATTTAAAAAAAACGAGAGTATAGGGGA  
CTTTTGGGATAGCATTTGAAATGTAAATGAAGAAAATAGCTAGTAAAAAATATTTTAAAAAAAATAAAATGGA  
ATATTTAAACAAAAACATGGTTTGTGAATACTTTGACCCAATTTGCTAAAATTGAGCTTAAATGTCATACA  
CATTTTTAAAAATCCATAACCCTACACTTATATTCCTTGATTGTTTCAAGAATTTTATATGATTTCTTTGGT  
ATGTACATTTTATTGAAATACCCCAAGCAGCATCATTGATAGAAAACTGTAAGGAGGTAATGAAATC  
TAGTCCAACTTGCTCCTAGAGATGTCAAATTAATTATCAGAAAGCTCTCTCTCACACACACACATA  
CACACACACACACACACACACACACACACCGCTAAAAACAAATAAAGCTAATTGTGCAAGGAGGCCTAGTTCC  
AGTCTTGATGGGCCAGGATAGGGGATACTCAGGGCGCCCTACACATTAGAGACAAAGAGGAAGCAAG  
GGAGAGGGTTGGGGGAGGGGGTACTGGGAGGAGGACAGTGAGTTGGTTGTAAGTGAATAAGAAAAAA  
A-3'

**Supplementary Figure S1. Full-length sequence of Erbb4-IR.** The 2310 nucleotides full-length sequence of Erbb4-IR is detected by sequencing the 5' and 3' RACE products.

ECR Browser on Mouse (mm10) [/ecrbrowser.dcode.org](http://ecrbrowser.dcode.org)

Parameters: Graph ECR length ECR similarity Layer height Coordinate system  
[\[change\]](#) smooth 100 70 55 relative

2,310 bps

[GENOME ALIGNMENT:](#) Align your sequence to a genome

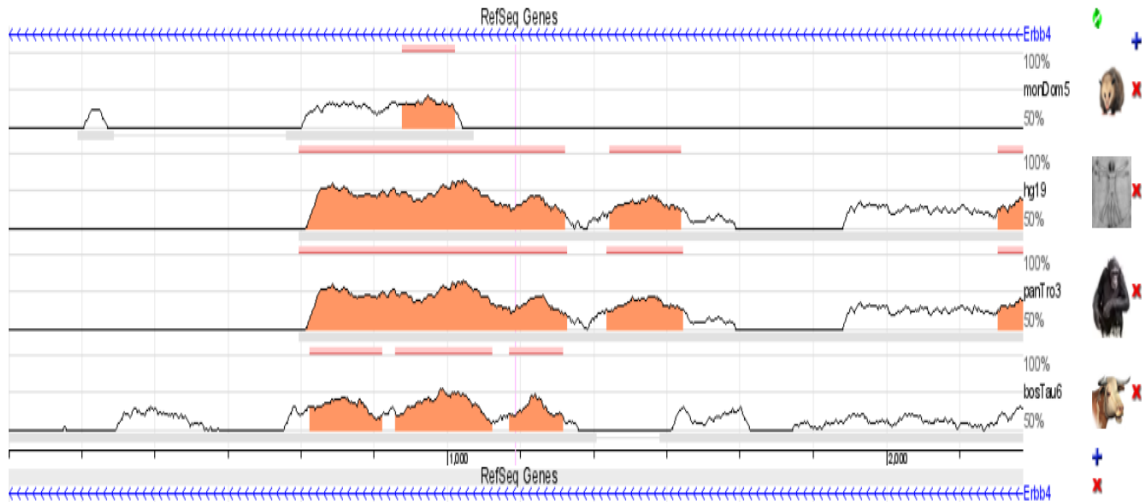

**Supplementary Figure S2. Evolutionary conserved regions of Erbb4-IR among genomes of different vertebrate species.** The sequence of Erbb4-IR is partially conserved among species.

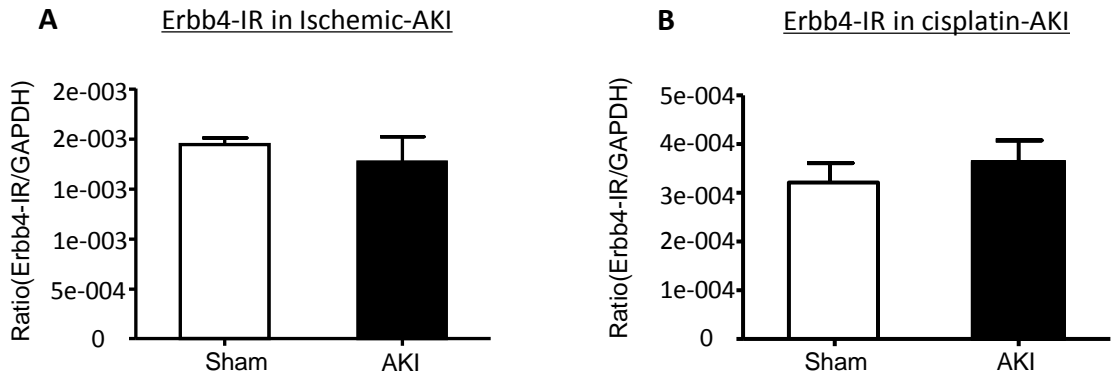

**Supplementary Figure S3. ErbB4-IR is not induced in the AKI-kidney.**

Real-time PCR analysis of ErbB4-IR expression in day 3 kidneys after ischemic reperfusion (IR) induced AKI kidney (A) or cisplatin-induced AKI kidney (B). Results show that ErbB4-IR is not upregulated in both types of AKI-kidneys. Each bar represents the mean  $\pm$  SEM for groups (N=3).

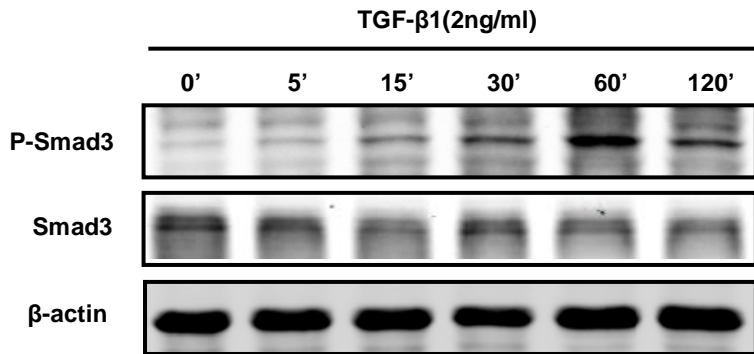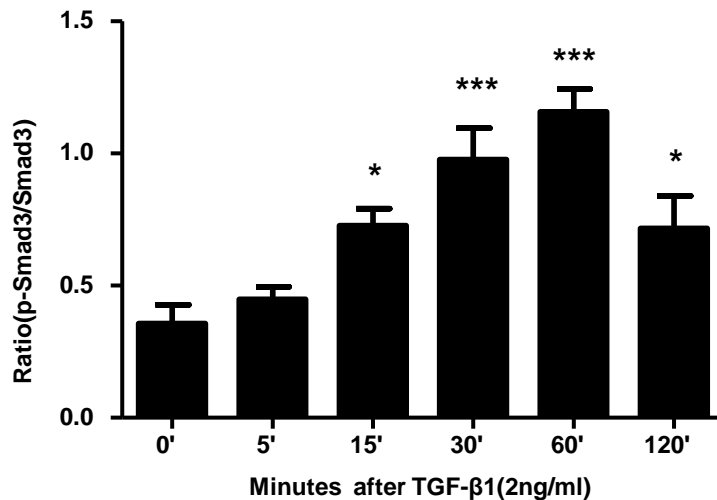

**Supplementary Figure S4. Time course study of Smad3 activation in mTEC under TGF- $\beta$ 1 stimulation.** Addition of 2ng/ml of TGF- $\beta$ 1 was able to induce a rapid activation of Smad3 as early as 15 minutes with the peak at 1 hour, showing by western blot and its quantification. Each bar represents the mean $\pm$ SEM for at least 3 independent experiments. \*P<0.05, \*\*\*P<0.001 compared with control at time 0 min.

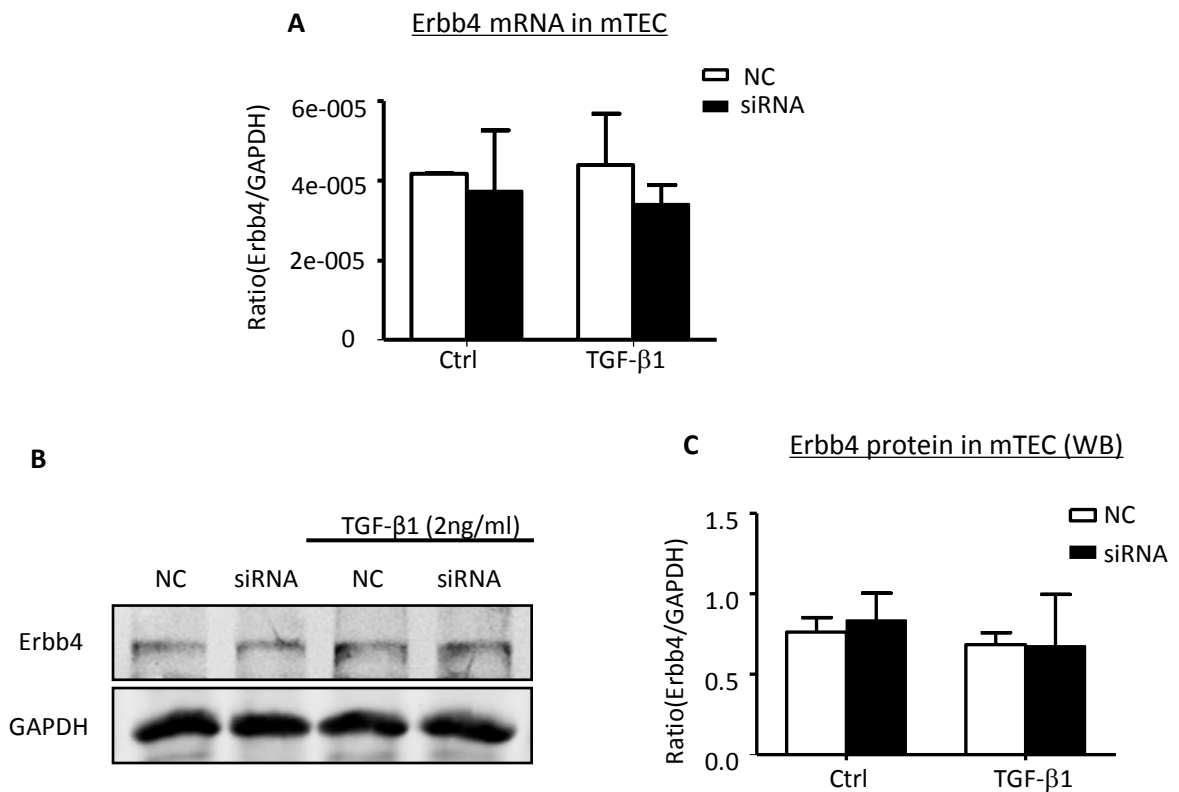

**Supplementary Figure S5. Host gene *ErbB4* was not induced by TGF-β1 and knockdown of *ErbB4*-IR had not effect on expression of *ErbB4* in mTECs *in vitro*.** (A) Real-time PCR analysis shows that transient transfection of siRNA against *ErbB4*-IR does not alter the expression of *ErbB4* in mTECs with or without TGF-β1 (2ng/ml) stimulation at 6h when compared with their nonsense-treated controls (NC). (B, C) Western blot analysis demonstrates that knockdown of *ErbB4*-IR does not alter the *ErbB4* protein levels in mTECs with or without TGF-β1(2ng/ml) treatment at 24h when compared with the NCs. Each bar represents the mean±SEM for at least 3 independent experiments.

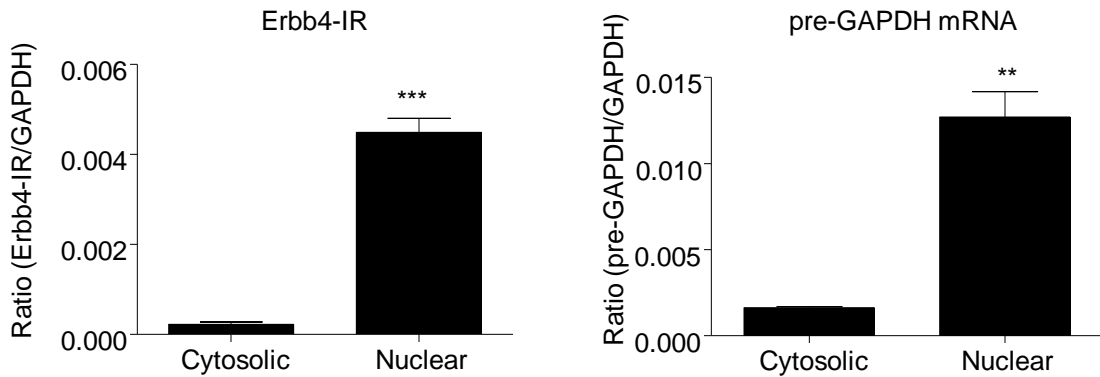

**Supplementary Figure S6. Subcellular localization of ErbB4-IR in mTEC after TGF- $\beta$ 1 stimulation.** The subcellular RNAs in mouse tubular epithelial cells(mTECs) were collected after 24h of TGF- $\beta$ 1 (2ng/ml) stimulation by using PRAIS™ Kit (Invitrogen AM1921). The expression levels of ErbB4-IR and pre-GAPDH (a nuclear positive control; forward primer: 5' GGCTCATGGTATGTAGGCAGT 3' Reverse primer: 5' GAAACACGGGGGCAATGAGT 3') were measured by real-time PCR. Our result showed that ErbB4-IR is mainly expressed as a nuclear RNA. Each bar represents the mean $\pm$ SEM for at least 3 independent experiments. \*\*P<0.01, \*\*\*P<0.001 compared with cytosolic RNA fraction.

**Predicted Interaction between Erbb4-IR and 3'UTR of Smad7 gene**

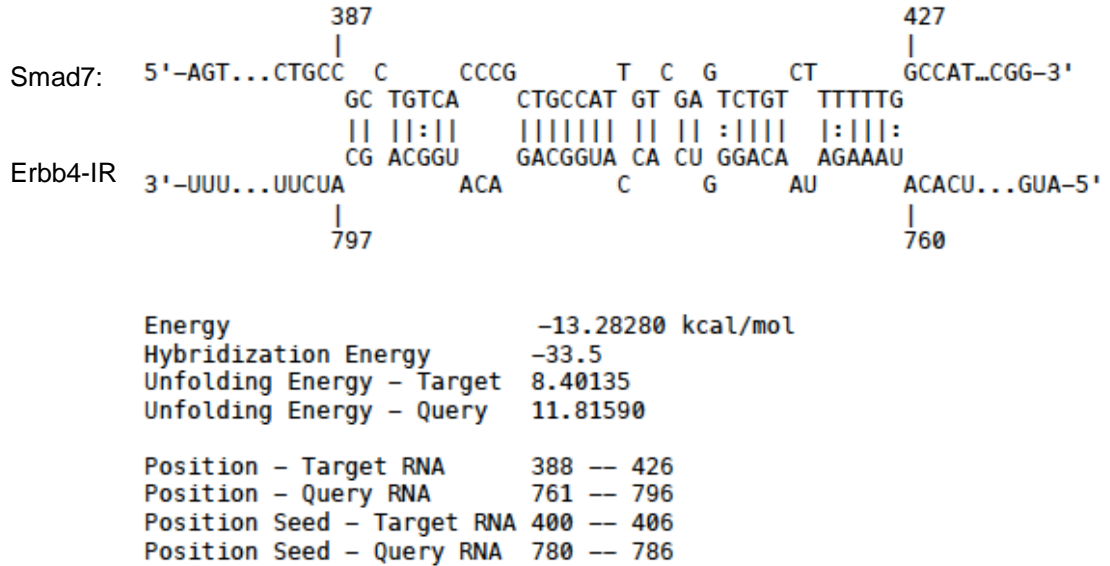

**Predicted interacting site of Erbb4-IR on 3'UTR of Smad7 gene (blue underlined)**

AGTACCTGGGCAGACTGGCAGCAGGTGCCAAGCTCTGCTCCAGCCTGCCGAAGCTGCCCC  
 GCCCCGCCCCGCCCCGCCCCACAGGACACGGGCCTATCCACAGGCTTCTGAGAAGCCA  
 GCCTGCTAGAAGGCTGAACCAAGCAATGTTTTCATCCCTGTCTTACTGCCGCCTGTCAC  
CCGCTGCCATTGTCGAGTCTGTCTTTTTTGCCATCTGCTCCTGGATCTCTCTTGAGATGG  
 GCTTCCAAGGGCTGCCGG

**Supplementary Figure S7. Binding site of Erbb4-IR on 3'UTR of Smad7 gene.**  
 Bioinformatic analysis predicts the binding site of Erbb4-IR on 3'UTR of Smad7  
 genomic sequence, highlighted in blue.
